# Supplementary material for: Seasonal Mortality of Wild Atlantic Menhaden (Brevoortia tyrannus) Is Caused by a Virulent Clone of Vibrio (Listonella) anguillarum; Implications for Biosecurity along the Atlantic Coastal United States
Source: Hindawi journal article supplement (doi:10.1155/2024/8816604), 2024-01-01
Supplement: f1 [file 8816604.f1.pdf]

01  
02b  
02a  
24b- Ab strain  
03- Type strain  
1

19

20

36

| Lane # | ID                 | Collection Location |
|--------|--------------------|---------------------|
| 1      | Va-21-2-2b         | Navesink/Red Bank   |
| 2      | Va-21-2-4b         | Navesink/Red Bank   |
| 3      | Va-21-2-7b         | Natco Lake          |
| 4      | Va-21-2-8b         | Natco Lake          |
| 5      | Va21-5-2B          | Natco Lake          |
| 6      | Va21-5-4B          | Natco Lake          |
| 7      | Va21-5-6B          | Natco Lake          |
| 8      | Va21-5-9B          | Navesink/Red Bank   |
| 9      | Va21-5-11B         | Navesink/Red Bank   |
| 10     | Va21-5-13B         | Shrewsbury River    |
| 11     | Va21-5-16B         | Shrewsbury River    |
| 12     | Va21-5-17B         | Shrewsbury River    |
| 13     | Va21-5-18B         | Shrewsbury River    |
| 14     | Va21-5-22B         | Shrewsbury River    |
| 15     | Va21-5-24B         | Navesink River      |
| 16     | Va21-5-28B         | Navesink River      |
| 17     | Va21-5-32B         | Navesink River      |
| 18     | Va-21-5-33B        | Navesink River      |
| 19     | Va-21-5-34Ka       | Shrewsbury River    |
| 20     | Va-21-5-35Ka       | Shrewsbury River    |
| 21     | 7 21-018 2b-9      | Freeport Creek      |
| 22     | Va-21-5-42B        | Delaware Bay        |
| 23     | Va-21-5-43K        | Delaware Bay        |
| 24     | Va-21-5-45B        | Delaware Bay        |
| 25     | Va-20-16-1B        | NJ                  |
| 26     | Va-20-16-6B        | NJ                  |
| 27     | NYVa-1             | Swan River          |
| 28     | NYVa-8             | Patch River         |
| 29     | NYVa-10            | Blue Point          |
| 30     | NYVa-13            | Blue Point          |
| 31     | NYVa-20            | Tuthils Creek       |
| 32     | NyVa-22            | Tuthils Creek       |
| 33     | 9 21-018 3b-2      | Freeport Creek      |
| 34     | 11 21-019 2b-1     | Peconic River       |
| 35     | 12 21-019 3b-1     | Peconic River       |
| 36     | MMSMS M21060803-K4 |                     |
